CORRECTION

# Correction: MATtrack: A MATLAB-Based Quantitative Image Analysis Platform for Investigating Real-Time Photo-Converted Fluorescent Signals in Live Cells

The *PLOS ONE* Staff

The Supporting Information files [S1 Movie](#), [S2 Movie](#), [S1 File](#) and [S2 File](#) do not appear in the published article. The publisher apologizes for the error. Please view the Supporting Information files below.

## Supporting Information

**S1 MOVIE. Timelapse movie of the Dendra2 unprocessed raw data.** Results from this data processed with MATtrack can be seen in Fig 6.  
(MOV)

**S2 MOVIE. Timelapse movie of the Dendra2UBC9 unprocessed raw data.** Results from this data processed with MATtrack and AndorIQ2 can be seen in Fig 7.  
(MOV)

**S1 File. MATtrack Guide.** Installation and operation instructions for MATtrack.  
(PDF)

**S2 File. MATtrack.**  
(ZIP)

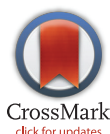

## Reference

1. Courtney J, Woods E, Scholz D, Hall WW, Gautier VW (2015) MATtrack: A MATLAB-Based Quantitative Image Analysis Platform for Investigating Real-Time Photo-Converted Fluorescent Signals in Live Cells. PLoS ONE 10(10): e0140209. doi: [10.1371/journal.pone.0140209](https://doi.org/10.1371/journal.pone.0140209) PMID: [26485569](https://pubmed.ncbi.nlm.nih.gov/26485569/)

## OPEN ACCESS

**Citation:** The *PLOS ONE* Staff (2015) Correction: MATtrack: A MATLAB-Based Quantitative Image Analysis Platform for Investigating Real-Time Photo-Converted Fluorescent Signals in Live Cells. PLoS ONE 10(11): e0143074. doi: [10.1371/journal.pone.0143074](https://doi.org/10.1371/journal.pone.0143074)

**Published:** November 11, 2015

**Copyright:** © 2015 The PLOS ONE Staff. This is an open access article distributed under the terms of the [Creative Commons Attribution License](https://creativecommons.org/licenses/by/4.0/), which permits unrestricted use, distribution, and reproduction in any medium, provided the original author and source are credited.
